# Supplementary material
Source: PubMed Central journal article supplement (PMC5398917)
Supplement: NIHMS815638-supplement-1.pdf [file NIHMS815638-supplement-1.pdf]

# Supplementary Figure 1

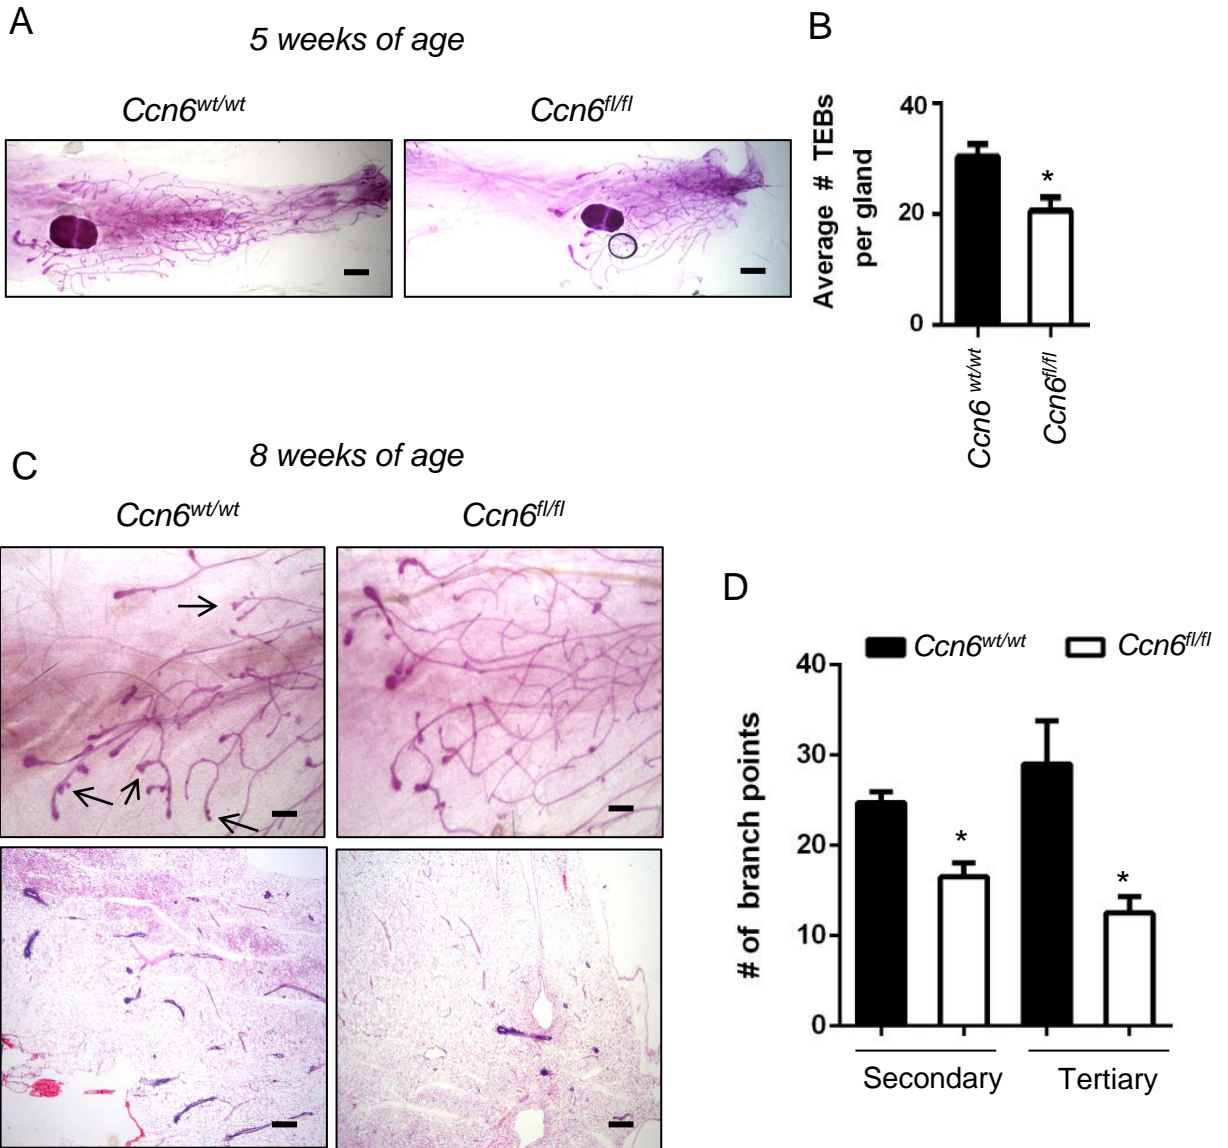

# Supplementary Figure 2

A 16 week old

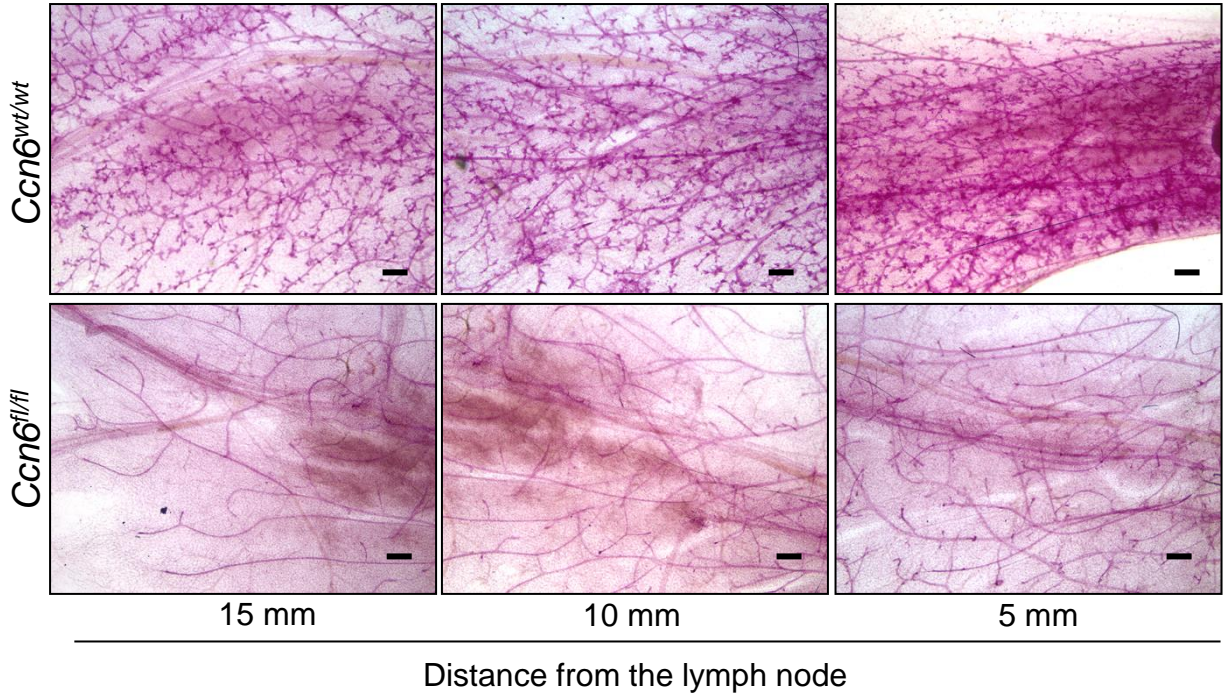

B 16 week old whole mounts

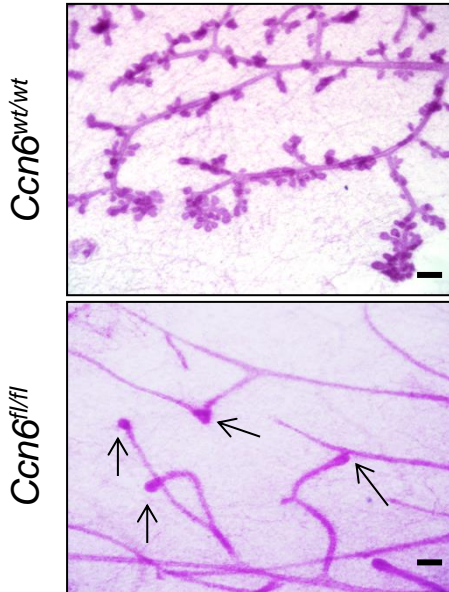

C 16 week old histology

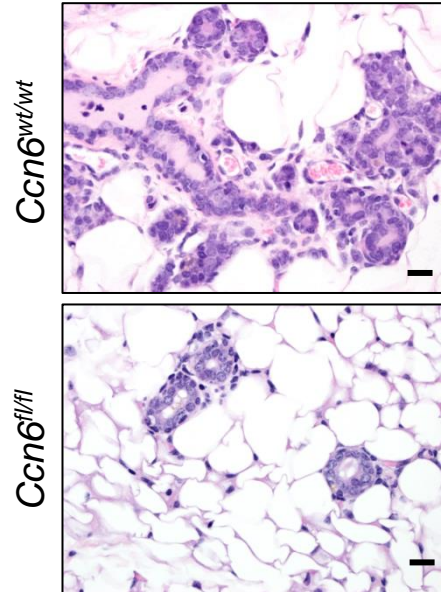

# Supplementary Figure 3

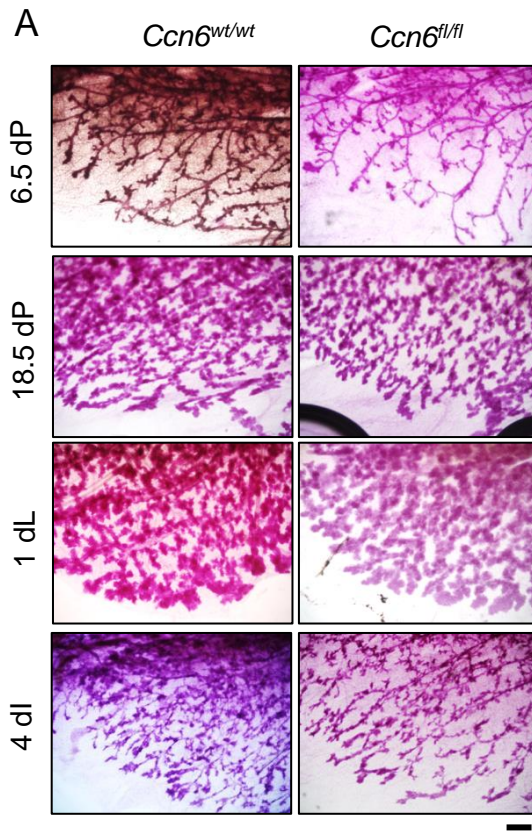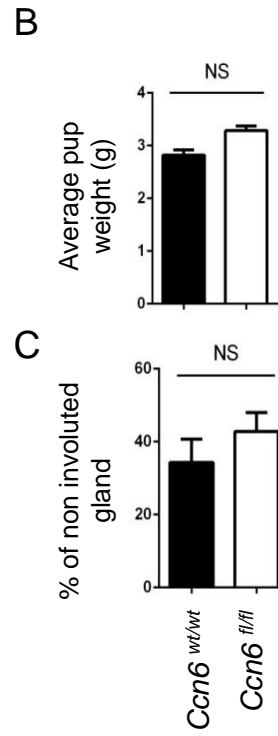

# Supplementary Figure 4

A

4 month old virgin mice mammary glands  
*Ccn6<sup>fl/fl</sup>* vs. *Ccn6<sup>wt/wt</sup>*

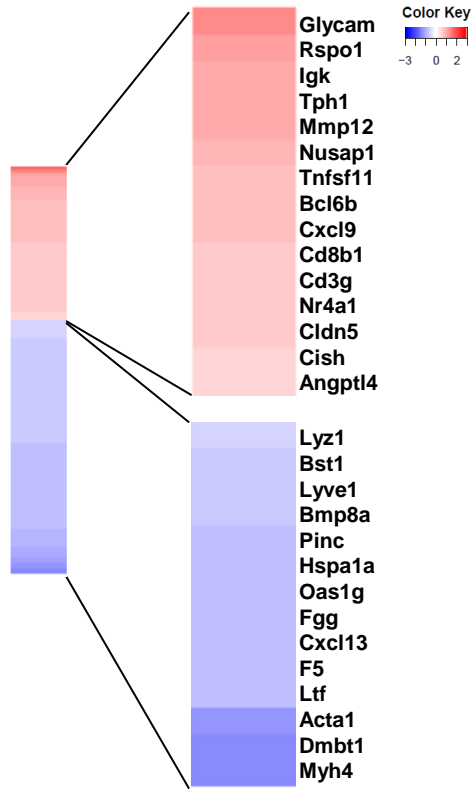

B

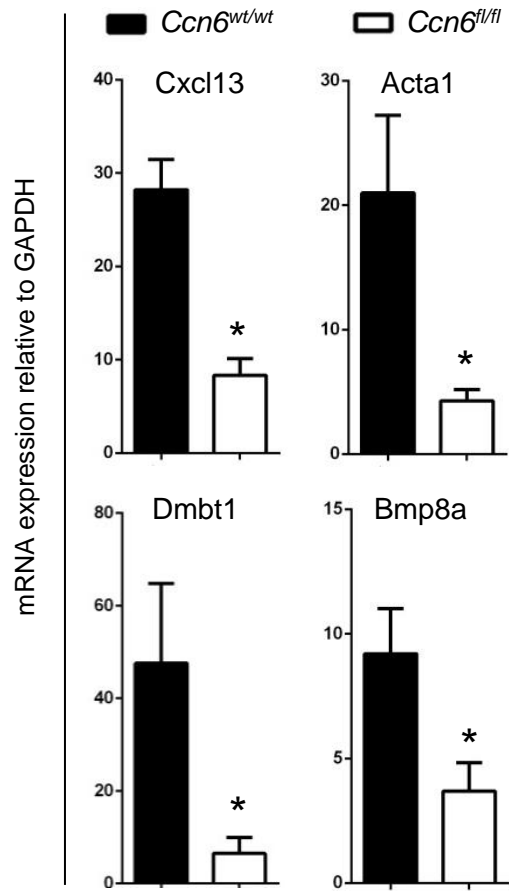

C

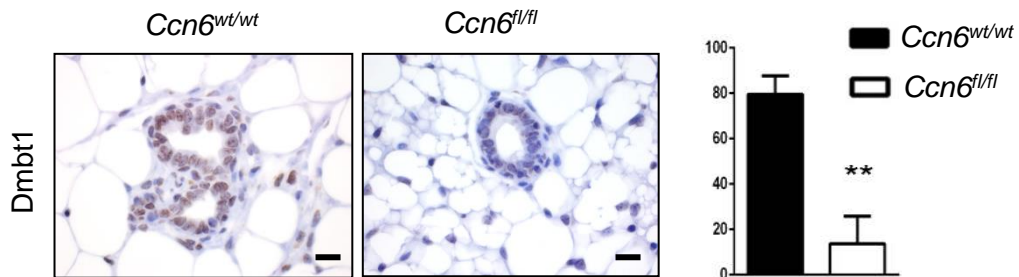



# Supplementary Figure 5

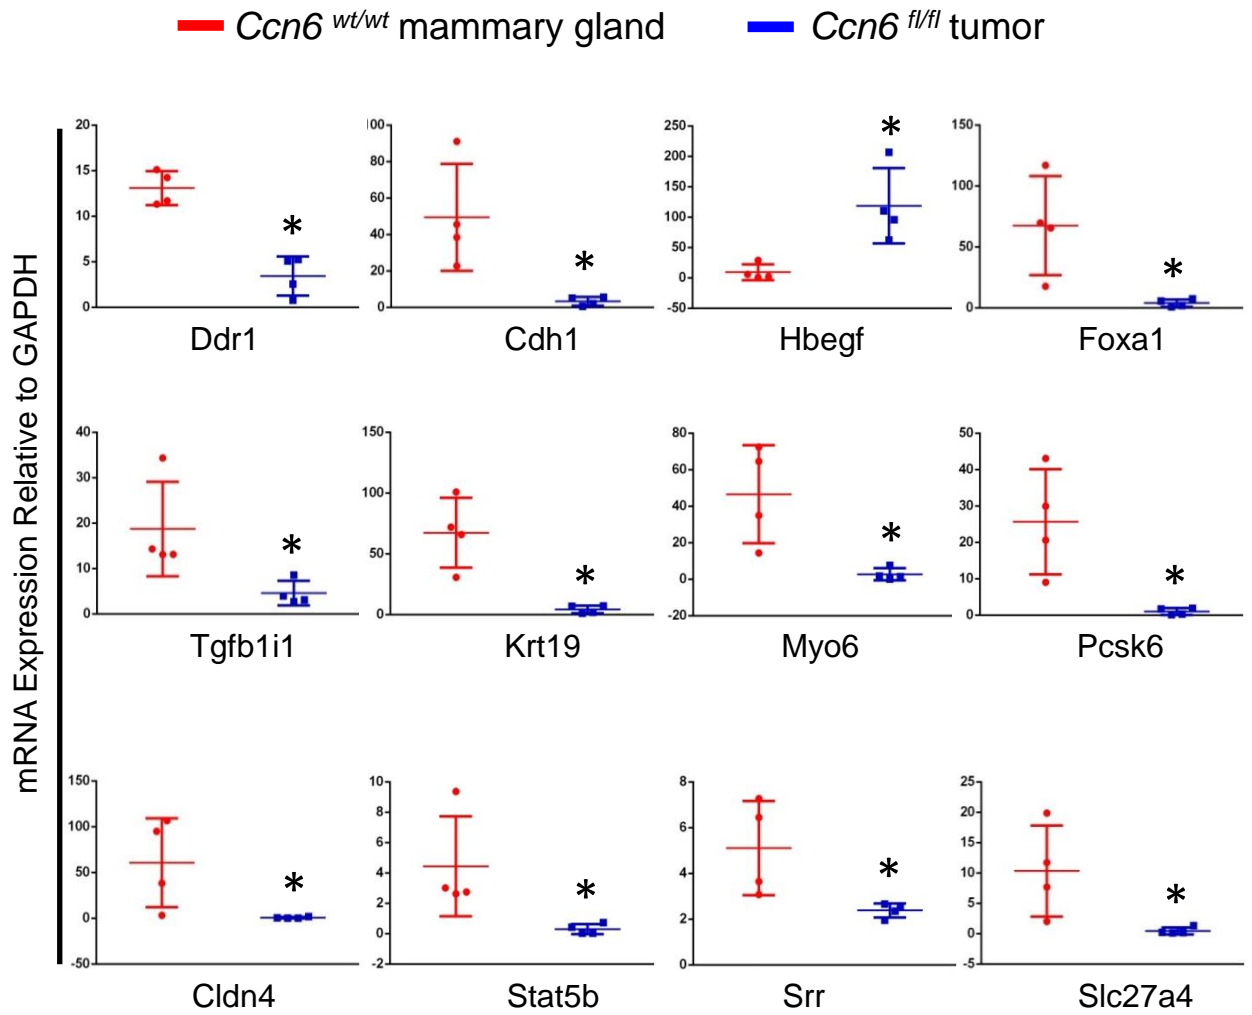

### Supplementary Figure Legends.

**Supplementary Figure 1. Mammary epithelial cell specific *Ccn6* knockout leads to reduced numbers of TEBs and mammary gland complexity in pre-pubertal and pubertal mice.** **A.** Mammary whole mounts from 5 week old control (*Ccn6*<sup>wt/wt</sup>) and CCN6 knockout (*Ccn6*<sup>fl/fl</sup>) mice. **B.** Quantification of the number of terminal end buds and bifurcated terminal end buds in 5 week old mammary CCN6 knockout (*Ccn6*<sup>fl/fl</sup>) and control glands (*Ccn6*<sup>wt/wt</sup>). \* p<0.02. **C.** TOP, Mammary whole mounts from 8 week old control (*Ccn6*<sup>wt/wt</sup>) and CCN6 knockout (*Ccn6*<sup>fl/fl</sup>) mice (top). Arrows point to bifurcating terminal end buds. BOTTOM, H&E sections of re-embedded mammary whole mounts stained with H&E. **D.** Quantification of the number of secondary and tertiary branch points in 8 week old CCN6 knockout (*Ccn6*<sup>fl/fl</sup>) and control glands (*Ccn6*<sup>wt/wt</sup>). \*p<0.05. All quantification was performed blinded to genotype by two independent counters with results reported as average +/- SEM. N=at least 3 mice per genotype. Two-tailed Student's *t*-test was used for all statistical analyses. (Scale bars, 500  $\mu$ m.)

**Supplementary Figure 2. Adult virgin *Ccn6* knockout mice exhibit a hypobranching mammary phenotype.** **A.** Mammary whole mounts from 16 week old female virgin control (*Ccn6*<sup>wt/wt</sup>) and CCN6 knockout (*Ccn6*<sup>fl/fl</sup>) mice at 5 mm, 10 mm, and 15 mm away from the mammary lymph node. (Scale bars, 500  $\mu$ m.) **B.** A close up view of mammary whole mounts. Arrows point to residual terminal end buds. (Scale bars, 250  $\mu$ m.) **C.** H&E stained sections of mammary glands of 16 week old female virgin mice. Note the hypoplastic appearance of CCN6 KO mice glands compared to controls. (Scale bars, 50  $\mu$ m.)

**Supplementary Figure 3. *Ccn6* deletion does not affect lactational hyperplasia, or post-lactational involution.** **A.** Mammary whole mounts from control and knockout mice throughout pregnancy. From top to bottom: 6.5 days pregnant (6.5 dP), 18.5 days pregnant (18.5 dP), 1

day of lactation (1 dL), and 4 days involution (4 dI). **B.** Average  $\pm$  SEM pup weight (g) for *Ccn6<sup>fl/fl</sup>;MMTV-Cre* and *Ccn6<sup>wt/wt</sup>;MMTV-Cre* litters. **C.** Quantification of the percentage of the mammary gland that had regressed to an approximately pre-pregnant state in 4 dI dams. Quantification was performed blinded to genotype by two independent counters with results reported as average  $\pm$  SEM. N=at least 3 mice per genotype. A two-tailed Student's *t*-test was used for all statistical analyses. (Scale bars, 500  $\mu$ m.)

**Supplementary Figure 4. Transcriptional expression profiles of pubertal virgin *Ccn6* knockout glands and controls.** **A.** Heatmap showing genes up or down regulated in virgin female pubertal knockout mice homogenates compared to controls. mRNA was isolated from 8 week old mammary glands from both groups and analyzed using an Affymetrix Plus Kit. **B.** Quantitative RT-PCR validation of selected genes from A. showing mRNA expression relative to *gapdh*. **C.** Immunohistochemical staining for DMBT1 in 8 week old control and *Ccn6* knockout glands. Data were quantified using image J. All quantification was performed blinded to genotype by two independent counters with results reported as average  $\pm$  SEM, N= at least 3 mice per genotype. Two-tailed Student's *t*-test was used for statistical analyses, with \**p*<0.01. (Scale bars, 20  $\mu$ m.)

**Supplementary Figure 5. Further validation of significantly deregulated transcripts in *Ccn6<sup>fl/fl</sup>;MMTV-Cre* mice tumors compared to *Ccn6<sup>wt/wt</sup>;MMTV-Cre* mammary glands.** Quantitative RT-PCR results for significantly deregulated genes in triplicate samples of at least three mice in each experimental group. \* *p*<0.05.
